# Supplementary material for: The Role of Systematic Reviews in Pharmacovigilance Planning and Clinical Trials Authorisation Application: Example from the SLEEPS Trial
Source: PubMed Central journal article supplement (PMC3598865; doi:10.1371/journal.pone.0051787), 2013-03-15
Supplement: pone.0051787.s001.pdf [file pone.0051787.s001.pdf]

**Table S1** Characteristics of Randomised Controlled Trials, Controlled Clinical Trials and observational studies.

| Study                  | Design                                                           | Population                                                                                                                                                                     | Follow up/ duration of treatment                                                                                                                                                                        | Dosing regime                                                                         |
|------------------------|------------------------------------------------------------------|--------------------------------------------------------------------------------------------------------------------------------------------------------------------------------|---------------------------------------------------------------------------------------------------------------------------------------------------------------------------------------------------------|---------------------------------------------------------------------------------------|
|                        |                                                                  |                                                                                                                                                                                |                                                                                                                                                                                                         | Loading dose (LD) and Continuous infusion rate (CIR)                                  |
| Arya 2001[22]          | RCT<br><br>Midazolam (n=17) vs placebo (n=16)                    | Preterm neonates (mean gestation age: 31.5 weeks<br>All infants were also receiving opiate infusion                                                                            | 48 hours of follow-up<br><br>Duration of ventilation median=53 hrs<br>Range=(7 to 216)                                                                                                                  | LD= 200 mcg/kg<br><br>CIR=60 mcg/kg/hr                                                |
| Anand 1999[23]         | RCT<br><br>Midazolam (n=22) vs morphine (n=24) vs placebo (n=21) | Preterm neonates (24-32 week gestational age; < 72 hours postnatal age<br><br>Patients received opiates if required for analgesia/sedation                                     | Study drug infusions were continued for as long as necessary or a max of 14 days<br><br>Ventilator support mean 14.2 hrs SD=11.1<br><br>Patients monitored until 12 hours after discontinuation of drug | LD=200 mcg/kg<br><br>CIR=20, 40 or 60 mcg/kg/hr depending on gestation age            |
| Jacqz-Aigrain 1994[25] | RCT<br><br>Midazolam vs placebo                                  | 24 Preterm Neonates (mean gestational age: 32.1; < 48 hours postnatal age)<br>Patients were allowed to receive bolus doses of opiates if required, but not continuous infusion | Patients monitored for 5 days of treatment but not to or following extubation<br>Mean duration of treatment mean=78.7 hrs<br>SD=30.9 hrs across midazolam and placebo groups                            | LD=Not administered<br><br>CIR=30 or 60 mcg/kg/hr depending on gestational age        |
| Parkinson 1997[24]     | RCT<br><br>Midazolam vs Chloral hydrate and promethazine         | 22 (1 day to 17 years)<br><br>Both groups also received morphine infusion                                                                                                      | Patients monitored after treatment cessation until patient breathing spontaneously<br>Durations of treatment and lengths of follow up not described                                                     | LD= Not administered<br><br>CIR=50 mcg/kg/hr starting rate. 300mcg/kg/hr maximum rate |
| Tobias 2004[21]        | RCT<br><br>Midazolam (n=10) vs                                   | Infants (2 to 70 months)<br>Patients received opiates if required for                                                                                                          | Patients followed for 48 hours of treatment of which only 24 hours was midazolam.                                                                                                                       | LD=Not administered<br><br>CIR=100 mcg/kg/hr                                          |

|                                      |                                                                                                                        |                                                                                                                    |                                                                                                                                                                                                                                  |                                                                                                           |
|--------------------------------------|------------------------------------------------------------------------------------------------------------------------|--------------------------------------------------------------------------------------------------------------------|----------------------------------------------------------------------------------------------------------------------------------------------------------------------------------------------------------------------------------|-----------------------------------------------------------------------------------------------------------|
|                                      | Dexmedetomidine<br>0.25 mcg/kg/hr<br>(n=10) vs<br>Dexmedetomidine<br>0.5mcg/kg/hr.                                     | analgesia/sedation                                                                                                 | After 24hrs on midazolam or<br>dexmedetomidine if mechanical ventilation<br>was still necessary, the patient was switched<br>to the alternative and the study continued<br><br>Midazolam infusion duration mean=22hrs<br>SD=8hrs |                                                                                                           |
| Treluyer 2005[20]                    | RCT<br><br>All infants (n=23)<br>were treated with<br>midazolam and<br>different doses<br>compared                     | Preterm neonates<br><br>(>33 weeks gestation age; <28 weeks<br>post-natal age)<br>Patients did not receive opiates | Infusion continued for up to 48 hours<br><br>Median observation time period 12h (1-60)                                                                                                                                           | LD=75 - 200 mcg/kg<br><br>CIR= Each patient randomised<br>to 37.5, 50, 62.5, 75, 87.5 or<br>100 mcg/kg/hr |
| Van Alfen van der<br>Velden 2006[19] | RCT<br><br>Midazolam (n=11) vs<br>morphine (n=10)<br><br>Patients treated with<br>midazolam did not<br>receive opiates | Preterm neonates<br><br>(26-33 week gestational age)                                                               | Outcomes measured up to 120 mins after<br>start of sedation only.                                                                                                                                                                | LD= 200 mcg/kg<br>CIR= 200 mcg/kg/hr                                                                      |
| Bergman 1991[38]                     | Retrospective Cohort<br>(n=45)                                                                                         | mean=3.94 years range=(0.03 years to<br>19.2 years)<br>Patients also received opiates                              | Duration of treatment: Mean infusion time<br>128 hours (range 12-917)<br><br>Length of follow up not described.                                                                                                                  | Maximal dose received:<br>230mcg/kg/hr (70-940)<br>Mean Total dose received:<br>29.8mg/kg (1.4-286)       |
| Booker 1986[40]                      | Prospective cohort<br>(n=50)                                                                                           | (6 months to 9 years)<br>All children were also administered<br>morphine                                           | Duration of treatment: Mean=46.7hr<br>Range=(13-197hrs) SD=54<br><br>Length of follow up post extubation was not                                                                                                                 | Mean dose: 228mcg/kg/hr<br>Maximal dose received:<br>564mcg/kg/hr                                         |

|                   |                             |                                                                           |                                                                                                                                                                 |                                                                                                                                                                                   |
|-------------------|-----------------------------|---------------------------------------------------------------------------|-----------------------------------------------------------------------------------------------------------------------------------------------------------------|-----------------------------------------------------------------------------------------------------------------------------------------------------------------------------------|
|                   |                             |                                                                           | described                                                                                                                                                       |                                                                                                                                                                                   |
| Ducharme 2005[27] | Prospective cohort (n=27)   | (> 1 month to 19years)<br>Opioids were also administered to some patients | Duration of treatment: Range: <1 day, >21 days<br>Length of follow up post weaning not provided                                                                 | Not provided                                                                                                                                                                      |
| Fonsmark 1999[31] | Retrospective cohort (n=38) | (6 months to 14 years)                                                    | Duration of treatment:<br>Withdrawal group: 4 days (range 1-13)<br>Non-withdrawal group: 3 days (range 1-11)<br>Length of followup post treatment not described | <i>Withdrawal group</i> : total dose 30.9 mg/kg (0.01-99.2)<br><i>Non-withdrawal group</i> : total dose 4.6 mg/kg (0.3-33)<br>All children received 'analgesics, mainly morphine' |
| Franck 2004[28]   | Prospective cohort (n=13)   | (6 weeks to 28 months)<br>All children also received opiates              | Duration of treatment prior to tapering median=9 days range=4-18<br>Duration of followup 2 days after treatment discontinuation                                 | Cumulative dose median 26.4 mg/kg (range 0-154).                                                                                                                                  |
| Hartwig 1991[39]  | Prospective cohort (n=24)   | (26 days to 5 years)<br>All patients were also administered fentanyl      | Duration of treatment: mean =11.6 days range= (38hr-40 days)<br>Length of follow up post infusion was not described.                                            | Doses ranged from 50-400mcg/kg/hr                                                                                                                                                 |
| Hughes 1994[34]   | Prospective cohort (n=53)   | (6 days – 11 years)<br>Patients did not receive concomitant opiates       | Duration of treatment: range 22 – 429 hrs<br>Duration of follow up: max of 1 week post                                                                          | Maximal dose received (range) 25-720mcg/kg/hr                                                                                                                                     |

|                        |                                                                                                                 |                                                                                                |                                                                                                             |                                                                                                                                                |
|------------------------|-----------------------------------------------------------------------------------------------------------------|------------------------------------------------------------------------------------------------|-------------------------------------------------------------------------------------------------------------|------------------------------------------------------------------------------------------------------------------------------------------------|
|                        |                                                                                                                 |                                                                                                | patient being fully conscious in presence of withdrawal symptoms                                            |                                                                                                                                                |
| Ista 2008[26]          | Prospective cohort (n=79)                                                                                       | Median age 3.4 months; range 0 days to 15.5 years<br>73 patients also received opiate infusion | Duration of treatment: Median 10 days (range 3-108)<br>Withdrawal symptoms observed median 6 days (1 to 67) | Median continuous dose 176 mcg/kg/hr (range 25-397);<br>Median maximal dose 300 mcg/kg/hr (range 25-700)                                       |
| Jacqz-Aigrain 1992[36] | Prospective cohort (n=15)                                                                                       | neonates (29-41 weeks gestational age)<br>7 of the patients also received opiates              | Duration of treatment: mean= 60 hrs<br>SD=23.3<br>Samples taken up to 24hr post infusion                    | CI= 60mcg/kg/hr                                                                                                                                |
| Jenkins 2007[6]        | Prospective cohort (360 children on PICU of which 268 were mechanically ventilated. 186/268 received midazolam) | (Median age 1.4 years, IQR0.33-7)<br><br>Other sedative/analgesic agents were also used.       | Duration of treatment: not provided<br><br>Followup until PICU discharge median 3 days<br>IQR 1-6 days      | <i>Withdrawal group:</i> Median dose<br><br>2mg/kg/day (IQR 1.1-3.3)<br><br><i>Non-withdrawal group:</i> median dose 1 mg/kg/day (IQR 0.5-1.9) |
| Lloyd-Thomas 1986[50]  | Prospective cohort (n=10)                                                                                       | (6 months to 8.75 years)<br>All children were also administered morphine                       | Duration of treatment: Mean=23.4 SEM= 0.69<br><br>Length of follow up post extubation was not described     | Mean dose: 186mcg/kg/hr<br>Maximal dose received: 300mcg/kg/hr                                                                                 |
| Pepperman 1997[32]     | Retrospective Cohort (propofol v non-propofol)                                                                  | (9 days to 16 years)                                                                           | Duration of treatment: Range 13 minutes to 11 days                                                          | Mean dose: 400mcg/kg/hr (range 10-4900)                                                                                                        |

|                      |                                |                                                                                                           |                                                                                                                                            |                                                                                  |
|----------------------|--------------------------------|-----------------------------------------------------------------------------------------------------------|--------------------------------------------------------------------------------------------------------------------------------------------|----------------------------------------------------------------------------------|
|                      | (n=61)                         | “Most patients” received supplementary opiates”                                                           | Length of followup not described                                                                                                           |                                                                                  |
| Rosen 1991[37]       | Retrospective Cohort<br>(n=55) | (0-19 years)<br><br>Supplementary opiates were prescribed as required                                     | Duration of treatment: Median: 74hrs<br>Range=(4-1272)hrs<br><br>Length of follow up post infusion was not described                       | Mean dose: 55.2mcg/kg/hr (-/+32.4)<br><br>Maximal dose received:<br>240mcg/kg/hr |
| Shekerdeman 1997[33] | Prospective Cohort<br>(n=10)   | (Median age 3.3 years<br><br>Range: 0.4–13.6)<br><br>All patients were also sedated with opiate infusion. | Duration of treatment: not provided<br><br>Length of follow up not described                                                               | Range: 100-200mcg/kg/h                                                           |
| Sheridan 1994 [35]   | Retrospective Cohort<br>(n=24) | (7 months to 17 years)<br><br>All patients were also treated with opiates                                 | Duration of treatment: Mean= 16.5 days<br>range=(4-56)<br><br>Length of followup post extubation not described                             | Mean maximal dose received:<br>110mcg/kg/hr range ( 40-350)                      |
| Sheridan 2001[30]    | Prospective cohort<br>(n=28)   | (6 months to 16 years)<br><br>All patients also received opiates                                          | Duration of treatment: Median: 15 days<br>range 8-112<br><br>Range: (1.1 – 48.9)<br><br>Length of follow up post extubation not described. | Median dose: 160mcg/kg/hr<br><br>Dose range: 30mcg/kg/hr – 290mcg/kg/hr          |
| Sheridan 2003[29]    | Prospective cohort             | (1.2 -13 years)<br><br>Opioids were also administered                                                     | Average duration: 12.7+/-10.9 days<br><br>Range: 2 – 33 days                                                                               | Average dose: 0.15+/-<br>0.16mg/kg/hr                                            |

|                                                                              |        |                                                   |                                |
|------------------------------------------------------------------------------|--------|---------------------------------------------------|--------------------------------|
|                                                                              | (n=11) | Length of follow up post extubation not described | Dose range: 0.06-0.65 mg/kg/hr |
| For characteristics of case reports and case series of midazolam see table 5 |        |                                                   |                                |
