# Supplementary material for: The Role of Systematic Reviews in Pharmacovigilance Planning and Clinical Trials Authorisation Application: Example from the SLEEPS Trial
Source: PubMed Central journal article supplement (PMC3598865; doi:10.1371/journal.pone.0051787), 2013-03-15
Supplement: pone.0051787.s002.pdf [file pone.0051787.s002.pdf]

**Table S2** Characteristics, quality and safety of clonidine studies.

| Non randomised controlled trials |                                                                                                                                                                                                                                                                                                                                                                                                                                                                                                                                      |                                                                                                                                                                                                                                                                                                                                                                                                                                                                            |                                                                                                                                                                                                                                                                                                                                                         |                                                                                                                                                                                                                                                                                                                                                                                                                                                                        |
|----------------------------------|--------------------------------------------------------------------------------------------------------------------------------------------------------------------------------------------------------------------------------------------------------------------------------------------------------------------------------------------------------------------------------------------------------------------------------------------------------------------------------------------------------------------------------------|----------------------------------------------------------------------------------------------------------------------------------------------------------------------------------------------------------------------------------------------------------------------------------------------------------------------------------------------------------------------------------------------------------------------------------------------------------------------------|---------------------------------------------------------------------------------------------------------------------------------------------------------------------------------------------------------------------------------------------------------------------------------------------------------------------------------------------------------|------------------------------------------------------------------------------------------------------------------------------------------------------------------------------------------------------------------------------------------------------------------------------------------------------------------------------------------------------------------------------------------------------------------------------------------------------------------------|
| Study                            | Overview                                                                                                                                                                                                                                                                                                                                                                                                                                                                                                                             | Safety                                                                                                                                                                                                                                                                                                                                                                                                                                                                     | Efficacy                                                                                                                                                                                                                                                                                                                                                | Quality                                                                                                                                                                                                                                                                                                                                                                                                                                                                |
| Ambrose 2000[51]                 | <p><b>Population:</b><br/>30 ventilated children aged 10 years and under.</p> <p><b>Interventions:</b> Group 1: 10 unparalysed ventilated patients were administered a clonidine infusion of 0.2 -1.0 mcg/kg/hr.</p> <p>Group 2: a further 10 unparalysed ventilated patients were administered a clonidine infusion of 0.2-2mcg/kg/hr.</p> <p>Group 3: 10 postoperative cardiac surgical patients were administered a fixed infusion rate of 1.0mcg/kg/hr.</p> <p>All patients were administered a background dose of midazolam</p> | <p><b>Cardiovascular/respiratory:</b> There were no “adverse effects on cardiovascular performance” in the two groups of unparalysed ventilated patients (group 1 and 2). The postoperative cardiac surgical patients (Group 3) had no significant change over 6 hours in heart rate, blood pressure or derived cardiac index.</p> <p>“Bradycardia and hypotension were not recorded in any patient”</p> <p>Withdrawal: not assessed</p> <p>Neurological: not assessed</p> | <p>Group 1: Two patients failed to maintain adequate sedation at the maximum infusion of clonidine 1 mcg/kg/hr, but the other 8 patients were adequately sedated for the entire study period.</p> <p>Group 2: Adequate sedation was recorded in 602 of the 672 hourly assessments (89.5%) and there were no failures.</p> <p>Group 3: Not described</p> | <p><b>Ascertainment of AE data</b><br/>Cardiovascular: actively sought. Methods for haemodynamic assessment clearly described.</p> <p>Withdrawal: Not assessed<br/>Neurological: not assessed</p> <p><b>Reporting of AE data:</b> Data presented numerically by intervention group. 2 patients were withdrawn from group 1 as there was a failure to maintain adequate sedation. Data up until withdrawal were included in the safety analysis for these patients.</p> |
| <b>Case reports/case series</b>  |                                                                                                                                                                                                                                                                                                                                                                                                                                                                                                                                      |                                                                                                                                                                                                                                                                                                                                                                                                                                                                            |                                                                                                                                                                                                                                                                                                                                                         |                                                                                                                                                                                                                                                                                                                                                                                                                                                                        |

| <b>Study</b>      | <b>Case series/case report</b> | <b>Summary</b>                                                                                                                                                                                                                                                                                        | <b>Adverse effects</b>                                                                                                                |
|-------------------|--------------------------------|-------------------------------------------------------------------------------------------------------------------------------------------------------------------------------------------------------------------------------------------------------------------------------------------------------|---------------------------------------------------------------------------------------------------------------------------------------|
| Lyons<br>1996[52] | Case report                    | 11 year old boy who suffered second and third degree burns to 78% of his body was intubated and ventilated using synchronised intermittent mandatory ventilation. Clonidine was introduced intravenously for pain relief after a rise in morphine requirements at a rate of 7.5 to10mcg every 4 hours | When the rate of clonidine infusion was increased from 7.5 to10mcg every 4 hours haemodynamic parameters were not adversely affected. |
